# Supplementary material for: Sequential Treatment With Fluoxetine and Relapse-Prevention CBT to Improve Outcomes in Pediatric Depression
Source: Atypon-hosted journal article supplement (doi:10.1176/appi.ajp.2014.13111460), 2014-06-17
Supplement: 1083_ds001.pdf [file 1083_ds001.pdf]

FIGURE S1. CONSORT Flow Diagram

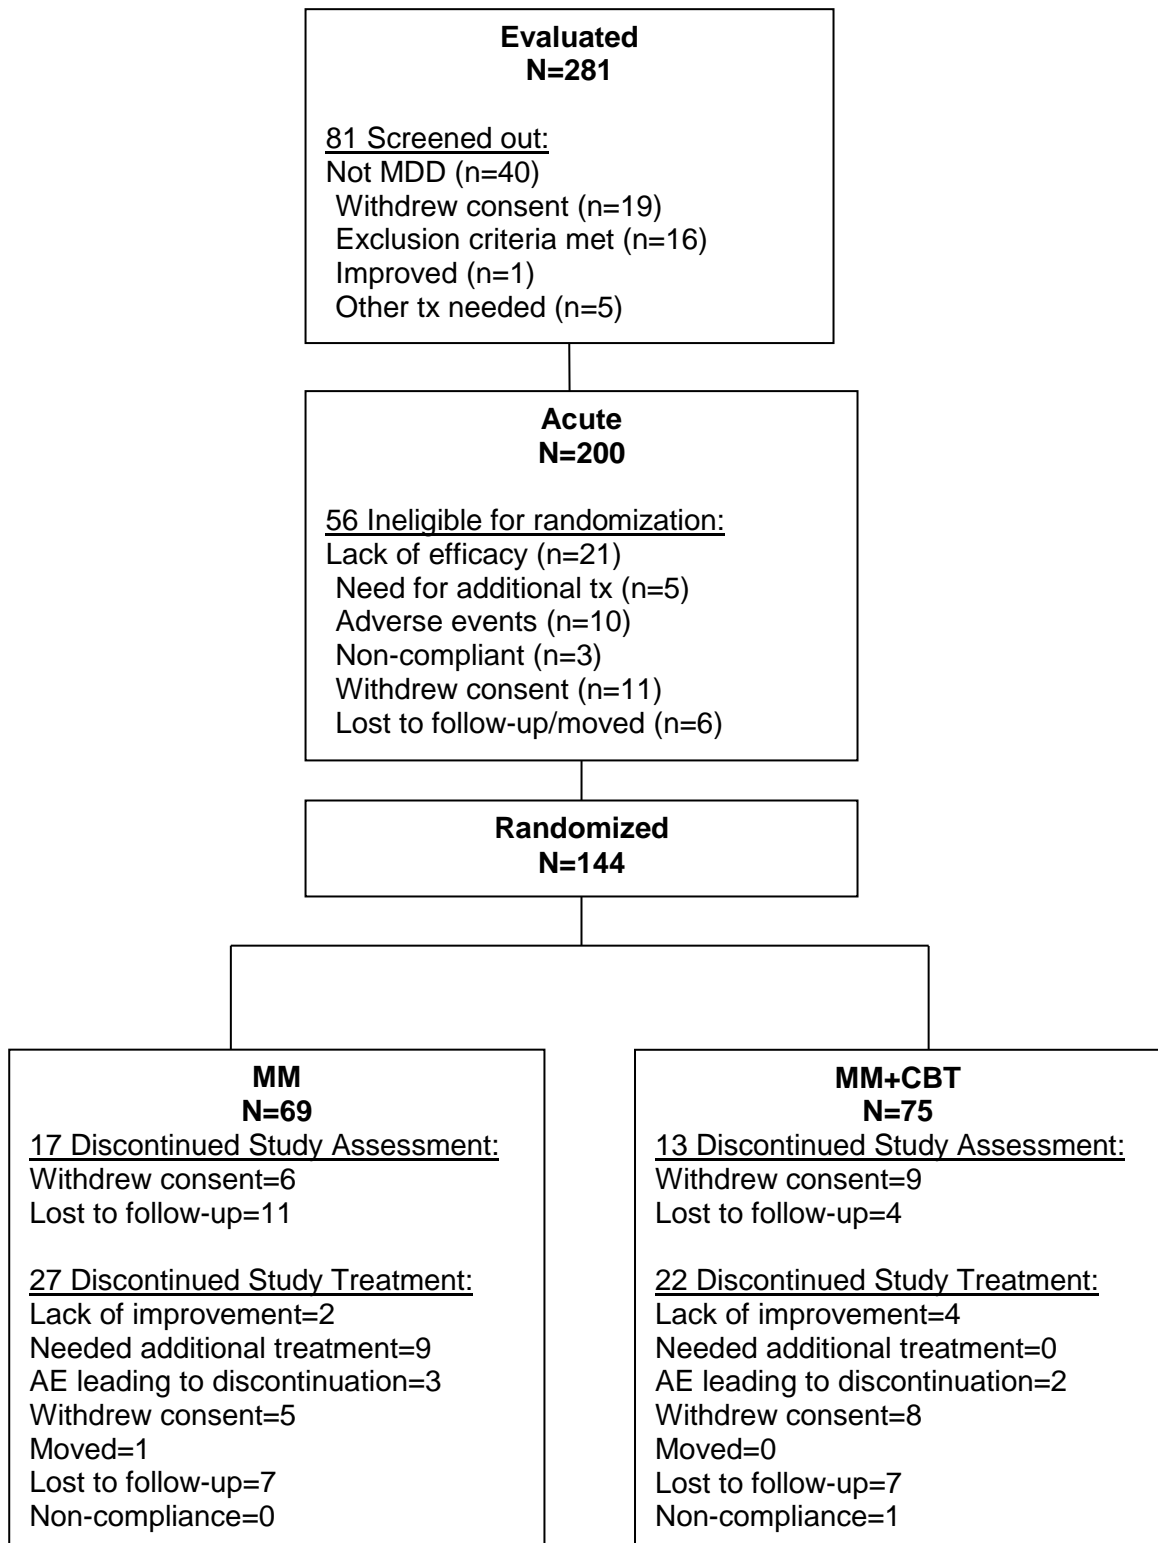

NOTE: Reason for discontinuing study assessments and reason for discontinuing treatment may have been different for an individual patient due to timing (i.e. one could discontinue treatment early in the study due to needing additional treatment, but later discontinue assessments due to withdrawing consent).
